# Supplementary material
Source: publisher figshare collection journal article supplement (https://aacr.figshare.com/articles/dataset/_/22472789)
Supplement: Supplementary file 1 [file 39924296]

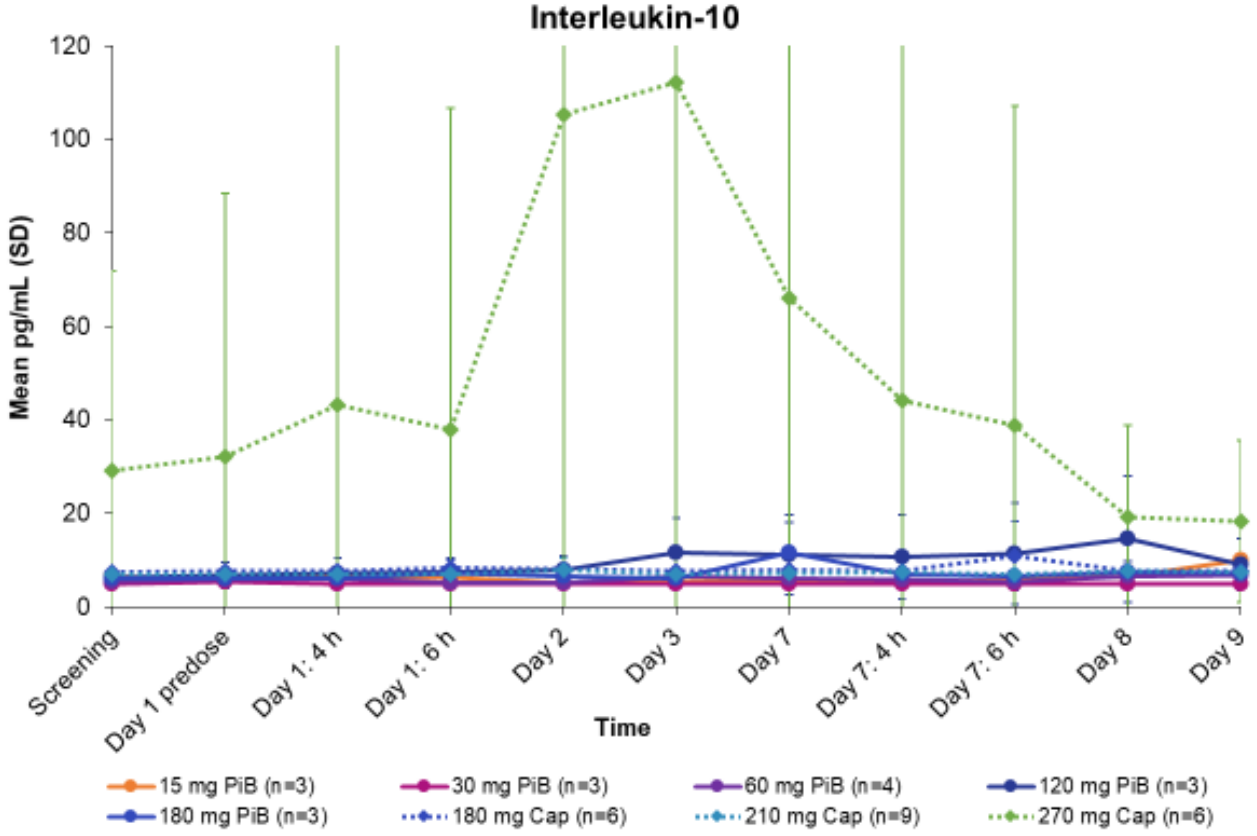

**Figure S4.**

Figure S4 shows changes in interleukin-10 in plasma from screening thru day 9 at the indicated doses. Cap, capsule.
